# Supplementary material
Source: Elsevier journal article supplement (https://comptes-rendus.academie-sciences.fr/geoscience/article/10.1016/j.crte.2018.10.001/file/attach/mmc1.pdf)
Supplement: mmc1 [file mmc1.pdf]

## Supplementary information

### 1. Calculation of single-crystal strain rates

Single-crystal strain rates are calculated based on published data for San Carlos olivine crystal rheology (Table S2), including corrections for water content and oxygen fugacity. The general flow law is

$$\dot{\epsilon} = A \sigma^n fO_2^m \exp\left(\frac{E^* + PV^*}{RT}\right) \quad \text{Eq. S1}$$

where  $\sigma$  is the differential stress,  $fO_2$  the oxygen fugacity,  $P$  the hydrostatic pressure, and  $T$  the temperature.  $R$  is the gas constant.  $A$ ,  $n$ ,  $m$ ,  $E^*$ , and  $V^*$  are constants adjusted to previous experimental data (Table S2).

For a dry single crystal of olivine with the  $[110]_c$  direction parallel to compression (promoting  $[100](010)$  dislocation slip), the crystal strain rate can be calculated according to

$$\dot{\epsilon}_{[110]_c} = B [\dot{\epsilon}_1 + ((\dot{\epsilon}_2)^{-1} + (\dot{\epsilon}_3)^{-1})^{-1}] \quad \text{Eq. S2}$$

with  $\dot{\epsilon}_1$ ,  $\dot{\epsilon}_2$ ,  $\dot{\epsilon}_3$  calculated using Eq. S1 and the parameters of Table S2. For a dry single-crystal,  $B = 1$ .

For a wet single-crystal  $B = 4.13$  (see below).

For a single crystal with the  $[011]_c$  direction parallel to compression (promoting  $[001](010)$  dislocation slip), the corresponding strain rate is

$$\dot{\epsilon}_{[011]_c} = B [\dot{\epsilon}_1 + \dot{\epsilon}_2]. \quad \text{Eq. S3}$$

with  $\dot{\epsilon}_1$  and  $\dot{\epsilon}_2$  calculated using Eq. S1 and the parameters of Table S2. For a dry single-crystal,  $B = 1$ .

For a wet single-crystal  $B = 24.7$  (see below).

Finally, for a dry single crystal with the  $[101]_c$  direction parallel to compression (promoting  $[100](001)$  and  $[001](100)$  slips together), the corresponding strain rate is

$$\dot{\epsilon}_{[101]_c} = B [((\dot{\epsilon}_1)^{-1} + (\dot{\epsilon}_2)^{-1})^{-1}] \quad \text{Eq. S4.}$$

with  $\dot{\epsilon}_1$  and  $\dot{\epsilon}_2$  calculated using Eq. S1 and the parameters of Table S2. For a dry single-crystal,  $B = 1$ . For a wet single-crystal  $B = 11.3$  (see below).

## **2. Effect of water**

Wet olivine single crystals are weaker than dry crystals, respectively by factors of  $\sim 1.5$ , 2.5 and 2.0 on the differential stress when deformed along  $[110]_c$ ,  $[011]_c$  and  $[101]_c$  directions [Mackwell *et al.*, 1985; Girard *et al.*, 2013]. When calculating  $\dot{\epsilon}_{IC}$  for wet aggregates, these weakening factors translate into factors of 4.13, 24.7 and 11.3 on crystal strain rates, accounting for olivine stress exponent  $n = 3.5$  in classical power laws [Bai *et al.*, 1991].

## **3. Supplemental References**

Peslier, A.H., Woodland, A.B., Bell, D.R., Lazarov, M. (2010) Olivine water contents in the continental lithosphere and the longevity of cratons, *Nature* **467**, 78-81.

## Supplementary Material

**Figure S1:** plots of the 80-Ma and 20-Ma oceanic geotherms and the continental geotherm used in this study. Pressure increase with depth is calculated using the upper-mantle average density ( $3.35 \text{ g/cm}^3$ ), i.e. a  $32.9 \text{ MPa/km}$  vertical gradient.

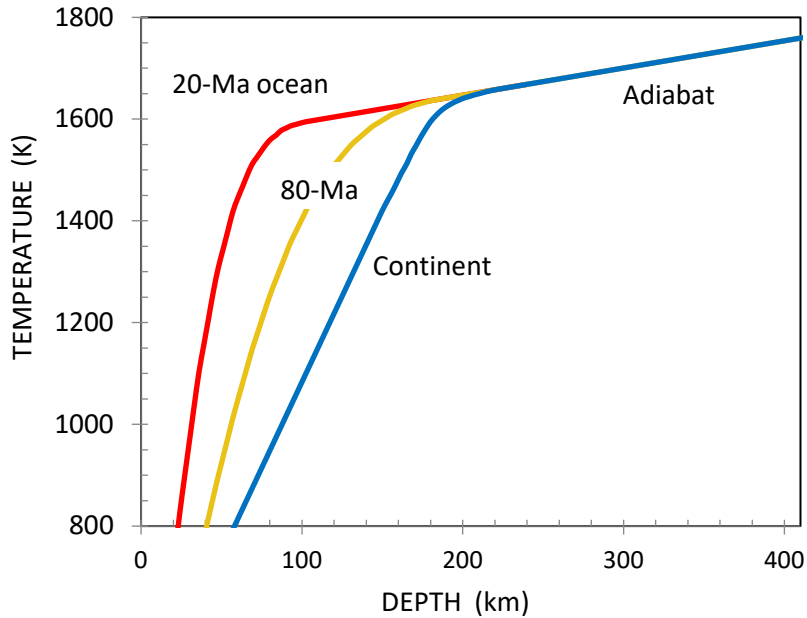

**Figure S2:** same as Figure 3.b, with  $\sigma = 50 \text{ MPa}$ .

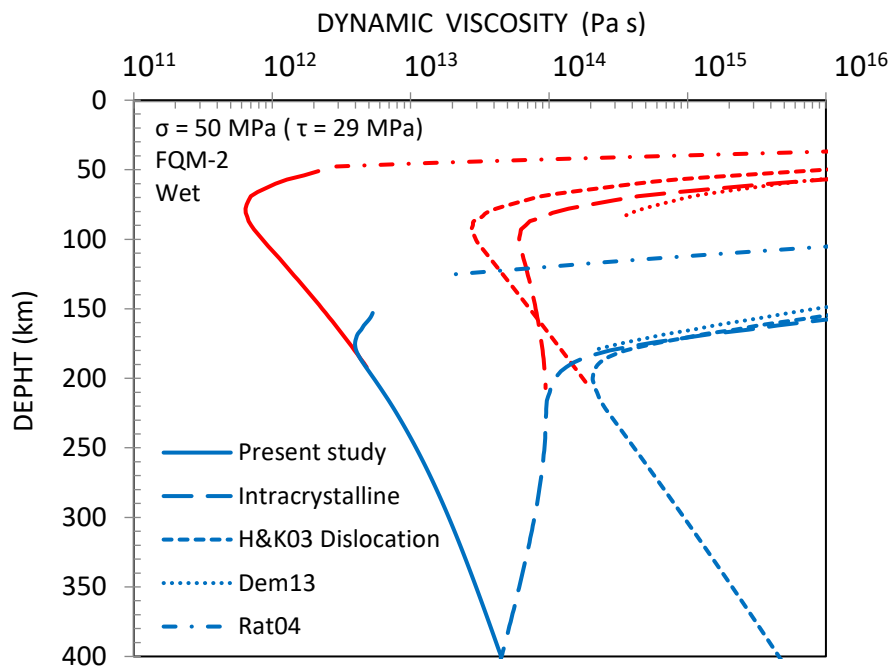

**Table S1:** Rheological data for olivine aggregates deformed in axial compression at high pressure and temperature.  $\dot{\epsilon}_{\text{Agg}}$  are raw experimental data.  $\dot{\epsilon}_{\text{IC}}$  are calculated from Eq. 3. For the unbuffered experiments, we assume either the iron-wüstite (IW) or the fayalite-magnetite-quartz (FMQ) buffer oxygen fugacity ( $f\text{O}_2$ ).

| Run #                                              | $P$<br>GPa | $\Delta P$<br>GPa | $T$<br>K | $\Delta T^*$<br>K | $\sigma$<br>MPa | $\Delta\sigma^*$<br>MPa | $f\text{O}_2$<br>atm | $f\text{O}_2$<br>atm | $\dot{\epsilon}_{\text{Agg}}$<br>$\text{s}^{-1}$ | $\Delta\dot{\epsilon}_{\text{Agg}}$<br>$\text{s}^{-1}$ | $\log(\dot{\epsilon}_{\text{Agg}}/\dot{\epsilon}_{\text{IC}})$ | $\log(\dot{\epsilon}_{\text{Agg}}/\dot{\epsilon}_{\text{IC}})$ | $\Delta\log(\dot{\epsilon}_{\text{Agg}}/\dot{\epsilon}_{\text{IC}})$ |
|----------------------------------------------------|------------|-------------------|----------|-------------------|-----------------|-------------------------|----------------------|----------------------|--------------------------------------------------|--------------------------------------------------------|----------------------------------------------------------------|----------------------------------------------------------------|----------------------------------------------------------------------|
| <i>Durham et al. [2009] : Dry. Ni-NiO buffered</i> |            |                   |          |                   |                 |                         | Ni-NiO               |                      | Ni-NiO                                           |                                                        |                                                                |                                                                |                                                                      |
| 140                                                | 4.2        | 0.05              | 1540     | 25                | 250             | 50                      | 6.13E-09             | -                    | 1.50E-05                                         | 5.80E-07                                               | 1.18                                                           | -                                                              | 0.44                                                                 |
| 144(1)                                             | 2.7        | 0.05              | 1477     | 25                | 300             | 50                      | 1.33E-09             | -                    | 1.90E-05                                         | 7.60E-07                                               | 1.39                                                           | -                                                              | 0.42                                                                 |
| 144(2)                                             | 4.8        | 0.05              | 1455     | 25                | 500             | 50                      | 7.52E-10             | -                    | 1.60E-05                                         | 5.20E-07                                               | 1.63                                                           | -                                                              | 0.39                                                                 |
| 145(1)                                             | 4.9        | 0.05              | 1453     | 25                | 250             | 50                      | 7.14E-10             | -                    | 1.90E-06                                         | 7.50E-08                                               | 1.83                                                           | -                                                              | 0.47                                                                 |
| 145(2)                                             | 4.9        | 0.05              | 1451     | 25                | 340             | 50                      | 6.77E-10             | -                    | 3.20E-05                                         | 1.30E-06                                               | 2.61                                                           | -                                                              | 0.43                                                                 |
| <i>Hilaireret et al. [2012]: Wet unbuffered</i>    |            |                   |          |                   |                 |                         | IW                   | FMQ                  |                                                  |                                                        | IW                                                             | FMQ                                                            |                                                                      |
| D0912-1                                            | 4.2        | 0.2               | 1373     | 25                | 1385            | 220                     | 4.86E-14             | 2.90E-10             | 6.70E-06                                         | 1.50E-07                                               | 0.69                                                           | -0.16                                                          | 0.48                                                                 |
| D1040-2                                            | 7.9        | 0.2               | 1375     | 25                | 2895            | 400                     | 5.20E-14             | 3.08E-10             | 1.10E-05                                         | 5.00E-08                                               | 0.51                                                           | 0.19                                                           | 0.49                                                                 |
| D1040-3                                            | 6.2        | 0.2               | 1375     | 25                | 2910            | 500                     | 5.20E-14             | 3.08E-10             | 1.49E-05                                         | 2.00E-07                                               | 0.36                                                           | -0.19                                                          | 0.50                                                                 |
| D1062-1                                            | 5.0        | 0.2               | 1506     | 25                | 76              | 25                      | 2.85E-12             | 1.19E-08             | 3.44E-06                                         | 2.00E-08                                               | 2.92                                                           | 2.42                                                           | 0.61                                                                 |
| D1062-3                                            | 5.8        | 0.2               | 1506     | 25                | 1465            | 260                     | 2.85E-12             | 1.19E-08             | 1.24E-05                                         | 6.00E-07                                               | -0.80                                                          | -1.25                                                          | 0.45                                                                 |
| D1040-1                                            | 6.8        | 0.2               | 1593     | 25                | 169             | 25                      | 2.83E-11             | 9.69E-08             | 1.27E-05                                         | 9.00E-08                                               | 0.54                                                           | 0.00                                                           | 0.47                                                                 |
| D0912-2                                            | 3.8        | 0.2               | 1600     | 25                | 212             | 50                      | 3.36E-11             | 1.14E-07             | 3.42E-05                                         | 2.90E-06                                               | 0.29                                                           | -0.24                                                          | 0.52                                                                 |
| D0912-3                                            | 4.3        | 0.2               | 1600     | 25                | 215             | 60                      | 3.36E-11             | 1.14E-07             | 1.40E-05                                         | 4.00E-07                                               | 1.47                                                           | 1.01                                                           | 0.40                                                                 |
| <i>Bollinger et al. [2014]: Wet unbuffered</i>     |            |                   |          |                   |                 |                         | IW                   | FMQ                  |                                                  |                                                        | IW                                                             | FMQ                                                            |                                                                      |
| 81                                                 | 7.2        | 0.1               | 1373     | 25                | 382             | 212                     | 4.86E-14             | 2.90E-10             | 3.80E-05                                         | 1.00E-06                                               | 4.06                                                           | 3.66                                                           | 0.95                                                                 |
| 81                                                 | 6.0        | 0.1               | 1373     | 25                | 493             | 160                     | 4.86E-14             | 2.90E-10             | 2.70E-05                                         | 1.00E-06                                               | 3.32                                                           | 2.74                                                           | 0.65                                                                 |
| 82                                                 | 10.6       | 0.1               | 1373     | 25                | 831             | 285                     | 4.86E-14             | 2.90E-10             | 2.60E-05                                         | 1.00E-06                                               | 3.17                                                           | 2.99                                                           | 0.70                                                                 |
| 87                                                 | 5.9        | 0.2               | 1373     | 25                | 737             | 183                     | 4.86E-14             | 2.90E-10             | 1.80E-05                                         | 6.00E-07                                               | 2.51                                                           | 1.91                                                           | 0.57                                                                 |
| 267                                                | 4.2        | 0.2               | 1373     | 25                | 800             | 217                     | 4.86E-14             | 2.90E-10             | 4.30E-05                                         | 1.00E-06                                               | 2.34                                                           | 1.49                                                           | 0.58                                                                 |
| 267                                                | 4.9        | 0.2               | 1373     | 25                | 917             | 595                     | 4.86E-14             | 2.90E-10             | 2.40E-05                                         | 7.00E-07                                               | 2.07                                                           | 1.32                                                           | 1.07                                                                 |
| 80                                                 | 4.0        | 0.1               | 1473     | 25                | 262             | 143                     | 1.11E-12             | 5.05E-09             | 3.40E-05                                         | 5.00E-06                                               | 2.24                                                           | 1.64                                                           | 0.90                                                                 |
| 88                                                 | 8.6        | 0.2               | 1473     | 25                | 884             | 170                     | 1.11E-12             | 5.05E-09             | 1.60E-05                                         | 6.00E-07                                               | 1.08                                                           | 0.80                                                           | 0.49                                                                 |
| 89                                                 | 5.7        | 0.2               | 1473     | 25                | 535             | 172                     | 1.11E-12             | 5.05E-09             | 1.30E-05                                         | 1.00E-06                                               | 1.21                                                           | 0.74                                                           | 0.61                                                                 |
| 89                                                 | 5.9        | 0.2               | 1473     | 25                | 504             | 191                     | 1.11E-12             | 5.05E-09             | 1.10E-05                                         | 2.00E-06                                               | 1.28                                                           | 0.82                                                           | 0.69                                                                 |
| 90                                                 | 7.9        | 0.2               | 1473     | 25                | 796             | 190                     | 1.11E-12             | 5.05E-09             | 1.70E-05                                         | 8.00E-07                                               | 1.16                                                           | 0.85                                                           | 0.53                                                                 |
| 81                                                 | 4.2        | 0.1               | 1573     | 25                | 341             | 88                      | 1.71E-11             | 6.11E-08             | 5.80E-05                                         | 2.00E-06                                               | 0.60                                                           | 0.07                                                           | 0.50                                                                 |
| 82                                                 | 9.0        | 0.1               | 1573     | 25                | 163             | 83                      | 1.71E-11             | 6.11E-08             | 2.50E-05                                         | 5.00E-06                                               | 2.52                                                           | 2.18                                                           | 0.85                                                                 |
| 87                                                 | 5.2        | 0.2               | 1573     | 25                | 203             | 203                     | 1.71E-11             | 6.11E-08             | 2.40E-05                                         | 3.00E-06                                               | 1.32                                                           | 0.82                                                           | 1.56                                                                 |
| 87                                                 | 6.1        | 0.2               | 1573     | 25                | 276             | 113                     | 1.71E-11             | 6.11E-08             | 2.50E-05                                         | 2.00E-06                                               | 1.13                                                           | 0.66                                                           | 0.71                                                                 |
| 88                                                 | 7.8        | 0.2               | 1673     | 25                | 272             | 137                     | 1.89E-10             | 5.49E-07             | 2.80E-05                                         | 3.00E-06                                               | 0.28                                                           | -0.22                                                          | 0.82                                                                 |
| 89                                                 | 5.5        | 0.1               | 1673     | 25                | 83              | 98                      | 1.89E-10             | 5.49E-07             | 4.40E-05                                         | 6.00E-06                                               | 1.65                                                           | 1.08                                                           | 1.82                                                                 |
| 89                                                 | 4.8        | 0.2               | 1673     | 25                | 248             | 137                     | 1.89E-10             | 5.49E-07             | 5.30E-05                                         | 1.00E-06                                               | -0.16                                                          | -0.74                                                          | 0.88                                                                 |
| 90                                                 | 7.2        | 0.1               | 1673     | 25                | 118             | 90                      | 1.89E-10             | 5.49E-07             | 4.50E-05                                         | 1.00E-06                                               | 1.61                                                           | 1.09                                                           | 1.20                                                                 |

\* $\Delta T$  is the estimated uncertainty on nominal  $T$ ;  $\Delta\sigma$  provided by N. Hilaireret for *Hilaireret et al. [2012]* data, and arbitrarily set to 50 MPa for *Durham et al [2009]* data.

Note that, within uncertainties, all data points but one verify  $\log(\dot{\epsilon}_{\text{Agg}}/\dot{\epsilon}_{\text{IC}}) \geq 0$ , i.e.  $\dot{\epsilon}_{\text{Agg}}/\dot{\epsilon}_{\text{IC}} \geq 1$  in good agreement with Eq. 3;  $\dot{\epsilon}_{\text{Agg}}/\dot{\epsilon}_{\text{IC}} < 1$  may occasionally result from the lower-bound approach used here to calculate the intracrystalline strain rate (overestimation of  $\dot{\epsilon}_{\text{IC}}$ ). See text for further explanations.

1 **Table S2.** Flow-law parameters<sup>†</sup> for orthopyroxene-buffer SC olivine single crystals

$$\text{Flow law : } \dot{\epsilon} = A \sigma^n f O_2^m \exp\left(\frac{E^* + PV^*}{RT}\right)$$

| Compression direction            |                    | $A$<br>(MPa <sup>-n</sup> atm <sup>-m</sup> s <sup>-1</sup> ) | $n$ | $m$  | $E^*$<br>(kJ/mol) | $V^*$<br>(cm <sup>3</sup> /mol) |
|----------------------------------|--------------------|---------------------------------------------------------------|-----|------|-------------------|---------------------------------|
| [110] <sub>c</sub> <sup>††</sup> | $\dot{\epsilon}_1$ | 0.02                                                          | 3.5 | 0.36 | 230               | 12                              |
|                                  | $\dot{\epsilon}_2$ | $1.3 \times 10^{22}$                                          | 3.5 | 0.10 | 1000              | 12                              |
|                                  | $\dot{\epsilon}_3$ | 1.2                                                           | 3.5 | 0.15 | 290               | 12                              |
| [011] <sub>c</sub> <sup>††</sup> | $\dot{\epsilon}_1$ | $2.1 \times 10^4$                                             | 3.5 | 0.02 | 540               | 3                               |
|                                  | $\dot{\epsilon}_2$ | $5.2 \times 10^5$                                             | 3.5 | 0.23 | 540               | 3                               |
| [101] <sub>c</sub> <sup>††</sup> | $\dot{\epsilon}_2$ | 0.65                                                          | 3.5 | 0.33 | 250               | 10.7                            |
|                                  | $\dot{\epsilon}_2$ | $5.3 \times 10^{11}$                                          | 3.5 | 0.06 | 690               | 10.7                            |

2 <sup>†</sup> $A$ ,  $n$ ,  $m$  and  $E^*$  from *Bai et al.* [1991],  $V^*$  from *Raterron et al.* [2009; 2012];

3 <sup>††</sup> $\dot{\epsilon}_{[110]_c} = \dot{\epsilon}_1 + ((\dot{\epsilon}_2)^{-1} + (\dot{\epsilon}_3)^{-1})^{-1}$ ;  $\dot{\epsilon}_{[011]_c} = \dot{\epsilon}_1 + \dot{\epsilon}_2$ ;  $\dot{\epsilon}_{[101]_c} = ((\dot{\epsilon}_1)^{-1} + (\dot{\epsilon}_2)^{-1})^{-1}$ ;

4 in wet conditions, strain rates must be multiplied by 4.13, 24.7 and 11.3, respectively

5 [*Mackwell and Kohlstedt*, 1985; *Girard et al.*, 2013].

6

7
